# Supplementary material for: Nitrogen-doped carbon nanotubes as efficient and durable metal-free cathodic catalysts for oxygen reduction in microbial fuel cells
Source: Royal Society of Chemistry journal article supplement (doi:10.1039/c1ee01153g), 2011-01-01
Supplement: c1ee01153g.pdf [file c1ee01153g.pdf]

## Supporting Information

### **Nitrogen-doped carbon nanotubes as efficient and durable metal-free cathodic catalyst for oxygen reduction in microbial fuel cells**

Leiyu Feng,<sup>a</sup> Yuanyuan Yan,<sup>a</sup> Yinguang Chen,<sup>\*a</sup> Lijun Wang<sup>b</sup>

<sup>a</sup> *State Key Laboratory of Pollution Control and Resources Reuse, School of Environmental Science and Engineering, Tongji University, Shanghai 200092, China*

<sup>b</sup> *Department of Environmental Engineering, Shanghai Second Polytechnic University, Shanghai, 201209, China*

\*Corresponding author E-mail: yinguangchen@yahoo.com; tel: 86-21-65981263; fax: 86-21-65986313

9  
10

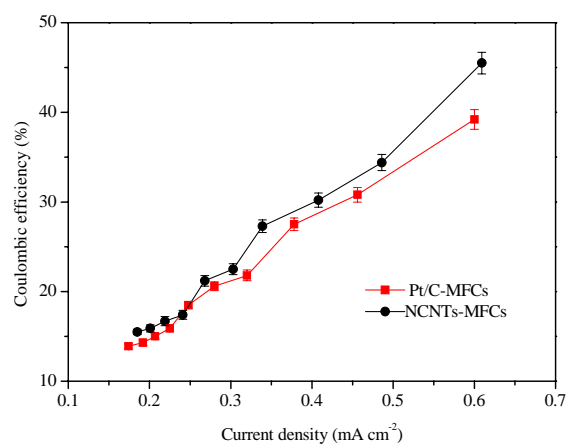

11  
12

**Fig. S1** Coulombic efficiencies in NCNTs-MFCs and Pt/C-MFCs. Error bars represent standard deviations of duplicate tests.

13

14

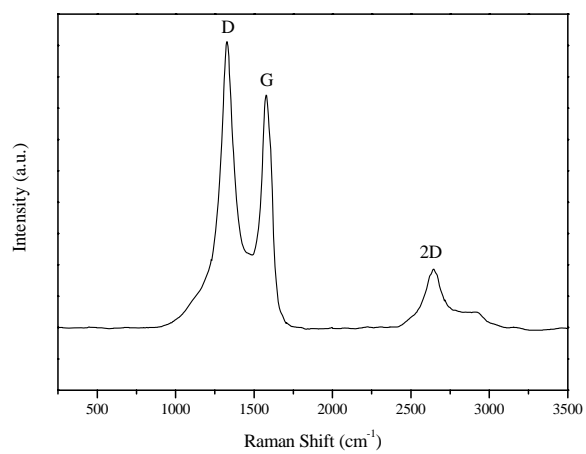

15

16

**Fig. S2 Raman spectra of NCNTs showing a high peak intensity ratio of D to G band.**
